# Supplementary material
Source: publisher figshare collection journal article supplement (https://tandf.figshare.com/ndownloader/files/14759042)
Supplement: Supplementary file 1 [file 14759042]

**Supplemental**

| Hospital  Characteristics | The University of Chicago Medicine15,16 | Rush University Medical Center17-19 | Cook County Health and Hospital System20-22 | Ann and Robert H. Lurie Children’s Hospital23,24 | University of Illinois Hospital & Health Sciences System25,26 |
| --- | --- | --- | --- | --- | --- |
| Adult/Pediatric | Yes/Yes | Yes/Yes | Yes/Yes | No/Yes | Yes/Yes |
| Hospital type | Private* | Private | Public | Private | Public |
| Location and primary community area served | South Side Chicago:  60609, 60615, 60617, 60619, 60620, 60621, 60628, 60636, 60637, 60643, 60649, 60653 | West Side Chicago:  60607, 60608, 60612, 60622, 60623, 60624, 60661 | West Side Chicago:  All of Cook County | Downtown Chicago:  Service area: City of Chicago and State of Illinois | West/Southwest Chicago:  60608, 60609, 606612, 60623, 60624, 60629, 60632 |
|  |  |  |  |  |  |
| Publically available information about the patient population and/or the service area population | 78.8% Black, 8.1% White, 10.4% Hispanic‡ | White: 50.4%  Black: 35.6%  American Indian: 0.3%  Asian: 1.3%  Hawaiian Pacific: 0.2%  Unknown: 11.6%  Hispanic or Latino: 16.6%  Not Hispanic or Latino: 82.5%  Unknown: 0.9% | White: 23.1%  Black 55.2%  American Indian 9.6%  Asian 4.8%  Hawaiian/Pacific 0.3%  Unknown 7%  Hispanic or Latino: 25%  Not Hispanic or Latino 74.9%  Not Known: 0.1% | White 40.4%  Black 18%  American Indian 0.1%  Asian 4.2%  Hawaiian/Pacific 0.1%  Unknown 37.2%  Hispanic or Latino 33.2% Not Hispanic or Latino 66.8%  Not known 0.0% | Twenty-one of 24 communities in the UI Health PSA have a minority population greater than 75%.  Eighty-three percent of UI Health’s PSA communities have a median household income lower than $47,408 (Chicago median) |
| Licensed Hospital Beds, n | 811 | 1,027 | 464 | 288 | 495 |
| EHR System (year deployed) | Epic (2008) | Epic (2010) | Cerner (2002) | Epic (2002) | Cerner (1999) |
| Insurance information if publically available | Inpatients Medicare: 33.3%  Medicaid: 33.4%  Other public: 0.0%  Private Insurance: 32.4%  Private Pay: 0.0%  Charity Care: 0.9%  Outpatients:  Medicare: 25.7%  Medicaid: 25.8%  Other Public: 0.0%  Private Insurance: 43.9%  Private Pay: 0.3%  Charity Care: 5.3% | Inpatients:  Medicare: 37.2%  Medicaid: 22.9%  Private insurance: 35.3%  Private Pay: 2.3%  Charity Care: 2.2%  Outpatients:  Medicare: 32.0%  Medicaid: 19.9%  Private insurance: 41.9%  Private Pay: 3.3%  Charity Care: 2.8% | Inpatients  Medicare 10.9%  Medicaid 31.0%  Private insurance 4.0%  Private pay 47.6%  Charity care 6.5%  Outpatients  Medicare 8.9%  Medicaid 17%  Private insurance 4.5%  Private pay 24.6%  Charity care 45.0% | Inpatients  Medicare 0.7%  Medicaid 49.6%  Other Public  0.3%  Private insurance 46.6%  Private pay0.5%  Charity care 2.3%  Outpatients  Medicare 0.3%  Medicaid 42.3%  Other Public  0.2%  Private insurance 54%  Private pay 2.5%  Charity care 0.6% | Inpatients┼  Medicare 22.75  Medicaid 47.02  Private insurance (HMO/PPO/Commercial) 27.55  Self-pay 1.34%  Charity care: 1.34%  Outpatients  Medicare 22.7%  Medicaid 41.72%  Private insurance (HMO/PPO/Commercial) 33.07%  Self-pay:1.06%  Charity care: 1.45% |
| Hospital Patient Days | 188,494 | 178,598 | 103983 | 69,948 | 99703 |
| Hospital Admissions | 29,809 | 32,020 | 23420 | 12,139 | 20,061 |
| Emergency Room Visits | 90,736 | 71,341 | 140,597 | 82,283 | 46,901 |
| Uncompensated Care | $196 million | $190 million | $226 million | $88 million | $28 million┴ |
| Community benefit programs | $312 million | $275 million | N/A | $127 million | N/A |
| Information from this table obtained through published reports15-26. If data not available publically, the table cell was left blank.  *Receives some government funding. Is a non-profit hospital.  ┴ Data from 2013  ┼ Data from 2015  ‡ 2010 Census Data  N/A: Not available | | | | | |
